# Supplementary material for: A missing link in the estuarine nitrogen cycle?: Coupled nitrification-denitrification mediated by suspended particulate matter
Source: PubMed Central journal article supplement (PMC5797115; doi:10.1038/s41598-018-20688-4), 2018-02-02
Supplement: 41598_2018_20688_MOESM1_ESM.pdf [file 41598_2018_20688_MOESM1_ESM.pdf]

## Supporting Information

### **A missing link in the estuarine nitrogen cycle?: Coupled nitrification-denitrification mediated by suspended particulate matter**

**Weijing Zhu<sup>1</sup>, Cheng Wang<sup>1</sup>, Jaclyn Hill<sup>2</sup>, Yangyang He<sup>1</sup>, Bangyi Tao<sup>3</sup>, Zhihua Mao<sup>3\*</sup>, Weixiang Wu<sup>1\*</sup>**

*<sup>1</sup>Zhejiang Province Key Laboratory for Water Pollution Control and Environmental Safety Technology, Institute of Environmental Science and Technology, Zhejiang University, 866 Yuhangtang Road, Hangzhou 310058, China*

*<sup>2</sup>Department of Zoology & Entomology, Rhodes University, PO Box 94, Grahamstown 6140, South Africa*

*<sup>3</sup>State Key Laboratory of Satellite Ocean Environment Dynamics, Second Institute of Oceanography, State Oceanic Administration, 36 Baochu North Road, Hangzhou 310012, China*

#### **Corresponding Author**

\*Phone: +86 571 88982020; fax: +86 571 88982020; e-mail: [weixiang@zju.edu.cn](mailto:weixiang@zju.edu.cn) (W. Wu);

#### **Co-corresponding Author**

\*Phone: +86 571 89163115; fax: +86 571 88071539; e-mail: [mao@sio.org.cn](mailto:mao@sio.org.cn) (Z. Mao);

### ***Quantitative PCR (qPCR)***

The abundance of anammox bacteria (AMB 16S rRNA gene) in the water column was also quantified using qPCR. The primers used are listed in Supplementary Table S6.

### ***Sediment collection, DNA extraction, Quantitative PCR and Illumina Miseq sequencing***

Sediment cores were collected at nine of the twenty sites in Hangzhou Bay (sites H1, H6, H7, H8, H9, H10, H14, H15 and H16; Figure 1). The top layer of sediments were sliced and immediately put into sterile plastic bags. The sediment samples were then frozen at -20 °C for later DNA extractions.

DNA was extracted from each sediment sample using the FastDNA spin kit for soil (Qbiogene, Carlsbad, CA, USA), following the manufacturer's instructions. DNA extractions were subsequently quantified using a Nano-Drop spectrophotometer (Nanodrop, Wilmington, DE, USA). The sediment DNA extractions were then stored at -80 °C for subsequent molecular analysis.

The procedures of qPCR and Illumina Miseq sequencing analyses for sediment DNA samples were identical to those procedures for the water DNA samples described in the manuscript.

**Supplementary Table S1** Coordinates and mean environmental parameters of the sampling sites in the water column of Hangzhou Bay

| Sample ID | Latitude (°N) | Longitude (°E) | Depth (m) | Temperature (°C) | Salinity (ppt) | DO (mg/L) | pH   | Chl a (µg/L) | SPM (g/L) | POC (g/g) | NH <sub>4</sub> <sup>+</sup> (µM) | NO <sub>2</sub> <sup>-</sup> (µM) | NO <sub>3</sub> <sup>-</sup> (µM) |
|-----------|---------------|----------------|-----------|------------------|----------------|-----------|------|--------------|-----------|-----------|-----------------------------------|-----------------------------------|-----------------------------------|
| H1_S      | 30.45         | 121.29         | 0.50      | 23.40            | 12.62          | 6.06      | 8.00 | 0.76         | 0.09      | 0.22      | 0.81                              | 0.41                              | 139.16                            |
| H2_S      | 30.58         | 121.29         | 0.50      | 21.40            | 17.76          | 6.49      | 8.01 | 0.65         | 0.31      | 0.13      | 0.76                              | 0.09                              | 109.83                            |
| H3_S      | 30.59         | 121.38         | 0.50      | 19.70            | 19.91          | 5.89      | 8.02 | 0.44         | 0.99      | 0.11      | 0.36                              | 0.09                              | 103.94                            |
| H4_S      | 30.44         | 121.39         | 0.50      | 23.50            | 13.46          | 6.07      | 8.00 | 0.86         | 0.13      | 0.15      | 0.65                              | 0.10                              | 147.87                            |
| H5_S      | 30.64         | 121.49         | 0.50      | 19.70            | 20.38          | 5.12      | 8.03 | 0.47         | 0.50      | 0.12      | 0.28                              | 0.06                              | 136.70                            |
| H6_S      | 30.52         | 121.49         | 0.50      | 21.40            | 17.72          | 6.55      | 7.94 | 0.84         | 0.17      | 0.18      | 0.94                              | 0.09                              | 131.27                            |
| H7_S      | 30.38         | 121.49         | 0.50      | 20.30            | 18.55          | 6.60      | 7.99 | 0.65         | 0.06      | 0.17      | 0.39                              | 0.07                              | 125.42                            |
| H8_S      | 30.31         | 121.58         | 0.50      | 20.10            | 24.63          | 6.82      | 8.03 | 0.50         | 0.34      | 0.12      | 0.84                              | 0.08                              | 101.28                            |
| H9_S      | 30.41         | 121.59         | 0.50      | 21.10            | 20.19          | 6.69      | 8.00 | 0.83         | 0.26      | 0.15      | 0.91                              | 0.07                              | 110.95                            |
| H10_S     | 30.54         | 121.61         | 0.50      | 20.70            | 20.85          | 6.62      | 8.03 | 0.86         | 0.42      | 0.12      | 0.76                              | 0.10                              | 103.38                            |
| H11_S     | 30.67         | 121.62         | 0.50      | 19.80            | 20.57          | 5.03      | 8.03 | 0.58         | 0.47      | 0.13      | 0.23                              | 0.05                              | 122.25                            |
| H12_S     | 30.69         | 121.72         | 0.50      | 19.80            | 21.04          | 5.07      | 8.02 | 0.49         | 0.35      | 0.14      | 0.18                              | 0.09                              | 107.70                            |
| H13_S     | 30.53         | 121.69         | 0.50      | 20.00            | 21.32          | 6.00      | 8.01 | 0.47         | 0.62      | 0.11      | 1.20                              | 0.05                              | 107.77                            |
| H14_S     | 30.54         | 121.72         | 0.50      | 19.50            | 22.83          | 6.64      | 8.02 | 0.46         | 0.76      | 0.12      | 0.84                              | 0.09                              | 131.81                            |
| H15_S     | 30.40         | 121.70         | 0.50      | 19.20            | 22.08          | 7.09      | 8.04 | 0.31         | 0.48      | 0.13      | 0.89                              | 0.09                              | 137.70                            |
| H16_S     | 30.29         | 121.69         | 0.50      | 18.30            | 30.00          | 7.33      | 8.03 | 0.26         | 0.19      | 0.16      | 1.78                              | 0.15                              | 118.28                            |
| H17_S     | 30.29         | 121.76         | 0.50      | 18.00            | 31.51          | 5.03      | 7.98 | 0.49         | 0.15      | 0.13      | 1.49                              | 0.13                              | 97.42                             |
| H18_S     | 30.38         | 121.80         | 0.50      | 18.20            | 31.61          | 5.83      | 8.00 | 0.54         | 0.60      | 0.12      | 1.52                              | 0.38                              | 90.45                             |
| H19_S     | 30.51         | 121.81         | 0.50      | 21.30            | 25.38          | 6.50      | 8.04 | 0.81         | 0.02      | 0.16      | 0.81                              | 0.07                              | 123.81                            |
| H20_S     | 30.58         | 121.82         | 0.50      | 19.90            | 22.93          | 6.77      | 7.99 | 1.75         | 0.20      | 0.15      | 2.70                              | 0.13                              | 134.40                            |
| H1_B      | 30.45         | 121.29         | 7.50      | 21.30            | 14.98          | 5.78      | 7.97 | 0.73         | 1.30      | 0.08      | 0.52                              | 0.12                              | 182.13                            |
| H2_B      | 30.58         | 121.29         | 13.00     | 20.10            | 17.83          | 6.35      | 7.99 | 0.49         | 0.87      | 0.07      | 0.23                              | 0.12                              | 117.82                            |
| H3_B      | 30.59         | 121.38         | 13.00     | 19.80            | 19.81          | 4.90      | 8.01 | 0.53         | 1.72      | 0.09      | 1.73                              | 0.40                              | 85.59                             |
| H4_B      | 30.44         | 121.39         | 7.00      | 21.20            | 17.17          | 6.35      | 7.97 | 1.03         | 1.97      | 0.10      | 0.47                              | 0.09                              | 157.01                            |
| H5_B      | 30.64         | 121.49         | 11.50     | 19.90            | 21.04          | 4.95      | 8.02 | 0.58         | 2.07      | 0.10      | 0.21                              | 0.06                              | 65.95                             |
| H6_B      | 30.52         | 121.49         | 7.50      | 20.30            | 18.70          | 6.50      | 7.98 | 0.78         | 1.99      | 0.10      | 0.63                              | 0.09                              | 102.87                            |
| H7_B      | 30.38         | 121.49         | 9.00      | 19.80            | 19.72          | 6.54      | 7.97 | 0.80         | 5.99      | 0.11      | 0.84                              | 0.41                              | 145.07                            |
| H8_B      | 30.31         | 121.58         | 9.00      | 18.80            | 27.46          | 6.99      | 7.96 | 0.45         | 3.15      | 0.10      | 0.28                              | 0.14                              | 81.32                             |
| H9_B      | 30.41         | 121.59         | 10.00     | 19.60            | 22.74          | 6.82      | 7.96 | 0.66         | 8.07      | 0.11      | 0.55                              | 0.15                              | 116.14                            |
| H10_B     | 30.54         | 121.61         | 8.00      | 20.10            | 20.38          | 6.69      | 8.01 | 0.78         | 2.18      | 0.10      | 1.60                              | 0.12                              | 100.66                            |
| H11_B     | 30.67         | 121.62         | 9.00      | 19.60            | 20.66          | 4.90      | 8.01 | 0.52         | 3.99      | 0.11      | 0.15                              | 0.10                              | 74.97                             |
| H12_B     | 30.69         | 121.72         | 9.00      | 20.10            | 21.89          | 6.76      | 8.01 | 0.56         | 0.59      | 0.05      | 0.05                              | 0.08                              | 61.62                             |
| H13_B     | 30.53         | 121.69         | 8.00      | 20.20            | 21.14          | 6.06      | 8.02 | 0.68         | 1.08      | 0.08      | 0.97                              | 0.09                              | 86.26                             |
| H14_B     | 30.54         | 121.72         | 10.00     | 19.20            | 22.93          | 6.43      | 8.02 | 0.48         | 0.63      | 0.05      | 0.28                              | 0.13                              | 85.09                             |
| H15_B     | 30.40         | 121.70         | 8.00      | 18.90            | 21.89          | 7.05      | 8.01 | 0.30         | 5.87      | 0.11      | 1.20                              | 0.14                              | 86.15                             |
| H16_B     | 30.29         | 121.69         | 12.00     | 18.00            | 31.51          | 7.36      | 8.00 | 0.27         | 1.92      | 0.10      | 1.36                              | 0.26                              | 64.99                             |
| H17_B     | 30.29         | 121.76         | 13.00     | 17.80            | 31.61          | 5.27      | 8.00 | 0.29         | 2.72      | 0.10      | 1.75                              | 0.15                              | 61.47                             |
| H18_B     | 30.38         | 121.80         | 14.50     | 18.30            | 31.23          | 5.29      | 8.01 | 0.59         | 1.92      | 0.10      | 1.33                              | 0.09                              | 62.13                             |
| H19_B     | 30.51         | 121.81         | 9.00      | 19.00            | 24.34          | 5.42      | 8.02 | 0.84         | 2.38      | 0.10      | 4.51                              | 0.32                              | 111.49                            |
| H20_B     | 30.58         | 121.82         | 8.00      | 19.30            | 23.12          | 6.71      | 8.02 | 0.71         | 2.30      | 0.10      | 1.96                              | 0.10                              | 118.93                            |

Note: \_S or \_B following the site number listed in the sampling ID column denotes surface or bottom water layer.

**Supplementary Table S2** Mean ( $\pm$ SD) quantitative PCR measurements for nitrifiers (AOA *amoA* and AOB *amoA* genes), denitrifiers (*nirK* and *nirS* genes) and anammox bacteria (AMB 16S rRNA gene) expressed per litre of sea water. S = Surface water; B = Bottom water

| Sample | Gene abundance (copies/L) |          |                 |          |             |          |             |          |          |          |
|--------|---------------------------|----------|-----------------|----------|-------------|----------|-------------|----------|----------|----------|
|        | AOA <i>amoA</i>           |          | AOB <i>amoA</i> |          | <i>nirK</i> |          | <i>nirS</i> |          | AMB 16S  |          |
| ID     | AOA <i>amoA</i>           | SD       | AOB <i>amoA</i> | SD       | <i>nirK</i> | SD       | <i>nirS</i> | SD       | AMB 16S  | SD       |
| H1_S   | 7.41E+05                  | 1.04E+05 | 2.93E+06        | 7.16E+05 | 2.74E+05    | 8.59E+04 | 1.24E+07    | 4.15E+05 | 3.69E+04 | 4.35E+02 |
| H2_S   | 3.16E+06                  | 2.28E+04 | 1.42E+07        | 3.92E+05 | 1.31E+06    | 2.74E+05 | 2.53E+07    | 1.82E+06 | 3.65E+05 | 3.72E+04 |
| H3_S   | 4.27E+07                  | 4.38E+05 | 1.31E+08        | 6.87E+06 | 1.36E+07    | 2.41E+06 | 1.61E+08    | 1.63E+07 | 2.72E+06 | 2.90E+05 |
| H4_S   | 7.52E+05                  | 1.88E+05 | 4.46E+05        | 1.53E+06 | 5.28E+05    | 8.63E+04 | 1.69E+07    | 1.35E+05 | 2.37E+05 | 2.45E+04 |
| H5_S   | 7.98E+06                  | 7.38E+04 | 4.45E+07        | 1.58E+05 | 3.94E+06    | 3.96E+05 | 4.15E+07    | 2.49E+06 | 6.39E+05 | 8.85E+04 |
| H6_S   | 3.00E+06                  | 1.61E+05 | 1.24E+07        | 1.08E+06 | 8.08E+05    | 9.70E+04 | 1.83E+07    | 7.77E+05 | 1.97E+05 | 2.77E+04 |
| H7_S   | 5.81E+05                  | 1.07E+05 | 1.51E+06        | 1.87E+05 | 2.39E+05    | 1.08E+04 | 4.07E+06    | 4.26E+05 | 5.74E+04 | 4.24E+03 |
| H8_S   | 6.25E+06                  | 1.01E+06 | 2.23E+07        | 3.76E+06 | 1.49E+06    | 1.32E+05 | 3.52E+07    | 2.36E+06 | 5.20E+05 | 1.33E+05 |
| H9_S   | 1.39E+06                  | 9.85E+04 | 6.92E+06        | 1.65E+06 | 4.72E+05    | 9.92E+04 | 1.25E+07    | 2.86E+06 | 1.48E+05 | 3.62E+04 |
| H10_S  | 8.86E+06                  | 1.51E+06 | 4.04E+07        | 9.74E+06 | 1.82E+06    | 3.44E+05 | 2.34E+07    | 5.24E+06 | 6.72E+05 | 1.76E+05 |
| H11_S  | 9.48E+06                  | 1.24E+06 | 5.20E+07        | 7.00E+05 | 5.29E+06    | 6.05E+05 | 5.29E+07    | 1.32E+06 | 8.51E+05 | 1.24E+05 |
| H12_S  | 8.83E+06                  | 8.76E+05 | 4.05E+07        | 6.10E+05 | 5.00E+06    | 7.38E+05 | 4.06E+07    | 2.15E+06 | 5.62E+05 | 4.76E+04 |
| H13_S  | 2.95E+06                  | 4.93E+05 | 1.24E+07        | 4.23E+06 | 7.59E+05    | 2.31E+05 | 5.79E+07    | 4.38E+06 | 3.62E+05 | 6.27E+04 |
| H14_S  | 4.07E+06                  | 7.84E+04 | 2.91E+07        | 6.42E+05 | 9.96E+05    | 4.29E+04 | 4.42E+07    | 7.58E+06 | 4.10E+05 | 3.80E+04 |
| H15_S  | 8.40E+06                  | 4.66E+05 | 3.98E+07        | 4.28E+05 | 2.04E+06    | 5.35E+04 | 7.96E+07    | 1.89E+07 | 8.14E+05 | 9.45E+04 |
| H16_S  | 5.60E+06                  | 3.66E+05 | 2.26E+07        | 1.51E+06 | 1.53E+06    | 1.89E+05 | 2.89E+07    | 6.72E+06 | 2.79E+05 | 5.83E+04 |
| H17_S  | 4.38E+06                  | 8.28E+04 | 1.93E+07        | 1.05E+06 | 1.32E+06    | 6.53E+04 | 1.99E+07    | 4.47E+06 | 2.42E+05 | 3.24E+04 |
| H18_S  | 2.42E+06                  | 2.33E+05 | 8.94E+06        | 5.03E+05 | 3.39E+05    | 3.00E+04 | 8.16E+06    | 1.35E+06 | 1.16E+05 | 3.25E+04 |
| H19_S  | 3.06E+05                  | 7.40E+04 | 7.15E+05        | 5.37E+04 | 6.15E+05    | 1.06E+05 | 6.86E+06    | 9.09E+05 | 3.29E+04 | 4.26E+03 |
| H20_S  | 8.82E+06                  | 9.21E+05 | 4.33E+07        | 2.90E+06 | 2.30E+06    | 3.87E+05 | 9.80E+07    | 1.33E+06 | 6.24E+05 | 5.03E+04 |
| H1_B   | 9.23E+06                  | 8.66E+05 | 2.88E+07        | 3.37E+06 | 5.62E+06    | 1.11E+06 | 1.03E+08    | 7.06E+06 | 6.38E+05 | 1.66E+05 |
| H2_B   | 5.38E+06                  | 2.44E+05 | 4.57E+07        | 5.29E+06 | 4.43E+06    | 5.80E+05 | 5.46E+07    | 4.59E+06 | 7.63E+05 | 1.08E+05 |
| H3_B   | 4.28E+06                  | 3.62E+05 | 1.56E+07        | 7.39E+05 | 1.59E+06    | 1.69E+05 | 2.04E+07    | 4.78E+06 | 2.54E+05 | 6.15E+04 |
| H4_B   | 1.21E+07                  | 3.34E+05 | 1.49E+07        | 2.05E+07 | 3.90E+06    | 7.52E+05 | 1.24E+08    | 8.13E+06 | 7.47E+05 | 1.85E+05 |
| H5_B   | 2.00E+07                  | 6.91E+05 | 1.13E+08        | 6.17E+06 | 1.24E+07    | 1.23E+06 | 1.25E+08    | 1.06E+07 | 1.95E+06 | 3.33E+05 |
| H6_B   | 8.01E+06                  | 7.61E+05 | 8.76E+06        | 1.96E+07 | 4.01E+06    | 1.00E+06 | 1.07E+08    | 9.99E+06 | 3.53E+05 | 5.35E+04 |
| H7_B   | 7.43E+07                  | 7.72E+05 | 4.22E+08        | 4.55E+07 | 4.95E+07    | 8.02E+06 | 5.90E+08    | 1.12E+07 | 9.81E+06 | 8.77E+05 |
| H8_B   | 1.53E+07                  | 1.23E+05 | 8.10E+07        | 1.33E+07 | 1.04E+07    | 1.70E+06 | 1.16E+08    | 1.34E+07 | 1.80E+06 | 2.91E+05 |
| H9_B   | 2.20E+07                  | 7.16E+05 | 1.01E+08        | 2.19E+07 | 1.18E+07    | 1.76E+06 | 1.43E+08    | 1.23E+06 | 2.24E+06 | 2.73E+05 |
| H10_B  | 8.04E+06                  | 2.21E+05 | 4.50E+07        | 1.23E+07 | 5.67E+06    | 1.32E+06 | 3.92E+07    | 4.66E+06 | 4.40E+05 | 1.68E+05 |
| H11_B  | 1.74E+05                  | 2.51E+04 | 3.01E+08        | 7.92E+06 | 2.37E+07    | 5.89E+06 | 3.02E+08    | 1.85E+07 | 4.33E+06 | 3.09E+05 |
| H12_B  | 8.79E+05                  | 5.85E+05 | 6.44E+07        | 6.09E+05 | 7.94E+06    | 2.24E+06 | 9.90E+07    | 6.00E+06 | 1.14E+06 | 1.54E+05 |
| H13_B  | 4.44E+06                  | 1.90E+05 | 2.60E+07        | 7.07E+06 | 2.41E+06    | 6.44E+05 | 1.92E+07    | 4.81E+06 | 5.05E+05 | 1.21E+05 |
| H14_B  | 1.92E+07                  | 6.07E+05 | 7.27E+07        | 1.79E+07 | 8.54E+06    | 2.32E+06 | 1.76E+08    | 2.13E+07 | 2.57E+06 | 3.79E+04 |
| H15_B  | 2.01E+07                  | 9.45E+05 | 1.57E+08        | 8.34E+06 | 1.34E+07    | 1.53E+06 | 1.49E+08    | 1.60E+07 | 3.61E+06 | 5.64E+05 |
| H16_B  | 2.04E+06                  | 9.94E+04 | 1.11E+07        | 1.10E+06 | 9.74E+05    | 2.49E+05 | 1.32E+07    | 2.91E+06 | 2.05E+05 | 5.93E+04 |
| H17_B  | 1.97E+07                  | 2.87E+05 | 1.35E+08        | 1.50E+07 | 1.36E+07    | 1.79E+06 | 1.37E+08    | 2.84E+07 | 2.49E+06 | 1.93E+05 |
| H18_B  | 4.53E+07                  | 4.77E+05 | 2.61E+08        | 1.14E+07 | 3.06E+07    | 1.81E+06 | 2.58E+08    | 5.11E+07 | 5.36E+06 | 1.09E+05 |
| H19_B  | 2.48E+07                  | 3.71E+05 | 1.76E+08        | 3.08E+07 | 1.69E+07    | 1.48E+06 | 1.70E+08    | 4.01E+07 | 3.05E+06 | 3.94E+05 |
| H20_B  | 1.89E+07                  | 2.84E+05 | 1.48E+08        | 1.15E+07 | 1.35E+07    | 1.61E+06 | 2.30E+08    | 1.07E+07 | 2.86E+06 | 3.96E+05 |

**Supplementary Table S3** Bacterial richness and diversity estimates

| Sample ID    | Read  |           | 97% similarity |        |         |
|--------------|-------|-----------|----------------|--------|---------|
|              | Raw   | Effective | OTUs           | Chao 1 | Shannon |
| <i>H1_S</i>  | 64002 | 55571     | 3280           | 4505   | 5.62    |
| <i>H3_S</i>  | 48089 | 39936     | 4376           | 5700   | 7.08    |
| <i>H5_S</i>  | 54975 | 50047     | 4547           | 5629   | 7.03    |
| <i>H6_S</i>  | 45772 | 41978     | 3781           | 4942   | 6.01    |
| <i>H7_S</i>  | 67694 | 62719     | 3288           | 4458   | 5.07    |
| <i>H8_S</i>  | 40247 | 39117     | 4022           | 5043   | 6.71    |
| <i>H9_S</i>  | 44496 | 43516     | 4016           | 4897   | 6.51    |
| <i>H10_S</i> | 43570 | 41596     | 4175           | 4990   | 7.08    |
| <i>H12_S</i> | 56459 | 53741     | 4445           | 5407   | 6.71    |
| <i>H14_S</i> | 46636 | 45013     | 4276           | 5211   | 6.90    |
| <i>H15_S</i> | 62959 | 59963     | 4713           | 5560   | 6.98    |
| <i>H17_S</i> | 74278 | 69053     | 4559           | 5484   | 6.70    |
| <i>H18_S</i> | 45457 | 43838     | 3326           | 3805   | 6.61    |
| <i>H19_S</i> | 42243 | 40844     | 2076           | 2930   | 4.83    |
| <i>H20_S</i> | 52085 | 49147     | 4273           | 5287   | 6.61    |
| <i>H1_B</i>  | 41901 | 40069     | 4300           | 5262   | 7.21    |
| <i>H3_B</i>  | 36107 | 34117     | 3744           | 4563   | 7.18    |
| <i>H5_B</i>  | 46192 | 40656     | 4356           | 5483   | 7.13    |
| <i>H6_B</i>  | 37511 | 35727     | 3963           | 4838   | 7.22    |
| <i>H7_B</i>  | 66351 | 62524     | 4817           | 5650   | 7.12    |
| <i>H8_B</i>  | 45363 | 43982     | 4211           | 4969   | 7.26    |
| <i>H9_B</i>  | 46179 | 44378     | 4471           | 5409   | 7.17    |
| <i>H10_B</i> | 40729 | 39079     | 4322           | 5457   | 7.11    |
| <i>H12_B</i> | 43596 | 42571     | 4288           | 5304   | 7.00    |
| <i>H14_B</i> | 41604 | 39482     | 4305           | 5377   | 7.04    |
| <i>H15_B</i> | 43812 | 41422     | 4510           | 5456   | 7.25    |
| <i>H17_B</i> | 47429 | 44005     | 4465           | 5337   | 7.33    |
| <i>H18_B</i> | 45626 | 42879     | 4439           | 5323   | 7.22    |
| <i>H19_B</i> | 42968 | 39642     | 4415           | 5453   | 7.24    |
| <i>H20_B</i> | 45438 | 43403     | 4470           | 5519   | 7.17    |

OTUs = operational taxonomic units; Chao 1 = Chao's abundance-based estimator; Shannon = Shannon-Weiner Index.

**Supplementary Table S4** Spearman's correlation coefficients (*rho*) between environmental parameters and the abundance of nitrifying genera

|                     | Variable             | SPM             | NH <sub>4</sub> <sup>+</sup> | NO <sub>2</sub> <sup>-</sup> | NO <sub>3</sub> <sup>-</sup> | AOB <i>amoA</i> | N  |
|---------------------|----------------------|-----------------|------------------------------|------------------------------|------------------------------|-----------------|----|
| Betaproteobacteria  | <i>Nitrosomonas</i>  | <b>-0.831**</b> | -0.156                       | <b>-0.595**</b>              | <b>0.442*</b>                | <b>-0.608**</b> | 30 |
|                     | <i>Nitrospira</i>    | 0.138           | 0.098                        | 0.004                        | -0.194                       | -0.182          | 30 |
| Gammaproteobacteria | <i>Nitrosococcus</i> | <b>0.422*</b>   | -0.121                       | 0.289                        | -0.314                       | 0.338           | 30 |

Data in bold indicate significant correlations, \* $P < 0.05$ , \*\* $P < 0.01$ .

**Supplementary Table S5** Spearman's correlation coefficients (*rho*) between SPM and the abundance of denitrifying genera

|                       | Variable                       | SPM                            | N              |
|-----------------------|--------------------------------|--------------------------------|----------------|
| Alphaproteobacteria   | <b><i>Bradyrhizobium</i></b>   | <b>0.741**</b>                 | 30             |
|                       | <i>Paracoccus</i>              | -0.172                         | 30             |
|                       | <i>Hyphomicrobium</i>          | 0.238                          | 30             |
|                       | <i>Azospirillum</i>            | 0.411*                         | 30             |
|                       | <b><i>Rhodobacter</i></b>      | <b>0.489**</b>                 | 30             |
|                       | <b><i>Rhizobium</i></b>        | <b>0.545**</b>                 | 30             |
|                       | <b><i>Methylobacterium</i></b> | <b>0.495**</b>                 | 30             |
| Betaproteobacteria    | <b><i>Comamonas</i></b>        | <b>0.567**</b>                 | 30             |
|                       | <b><i>Thauera</i></b>          | <b>0.592**</b>                 | 30             |
|                       | <i>Burkholderia</i>            | 0.457*                         | 30             |
|                       | <i>Azospira</i>                | 0.200                          | 30             |
|                       | <i>Thiobacillus</i>            | -0.261                         | 30             |
|                       | <i>Ralstonia</i>               | 0.270                          | 30             |
|                       | <i>Cupriavidus</i>             | 0.298                          | 30             |
|                       | <i>Acidovorax</i>              | 0.326                          | 30             |
|                       | <i>Neisseria</i>               | 0.371*                         | 30             |
|                       | <i>Alcaligenes</i>             | 0.455*                         | 30             |
|                       | <i>Achromobacter</i>           | -0.099                         | 30             |
| Gammaproteobacteria   | <i>Pseudomonas</i>             | 0.290                          | 30             |
|                       | <b><i>Stenotrophomonas</i></b> | <b>0.596**</b>                 | 30             |
|                       | <i>Pseudoalteromonas</i>       | 0.430*                         | 30             |
|                       | <b><i>Acinetobacter</i></b>    | <b>0.471**</b>                 | 30             |
|                       | <i>Halomonas</i>               | 0.442*                         | 30             |
|                       | <i>Psychrobacter</i>           | -0.322                         | 30             |
|                       | <i>Marinobacter</i>            | -0.101                         | 30             |
|                       | <i>Alteromonas</i>             | 0.318                          | 30             |
|                       | <i>Xanthomonas</i>             | 0.124                          | 30             |
|                       | Deltaproteobacteria            | <b><i>Anaeromyxobacter</i></b> | <b>0.519**</b> |
| Epsilonproteobacteria | <b><i>Sulfurimonas</i></b>     | <b>0.566**</b>                 | 30             |
|                       | <b><i>Arcobacter</i></b>       | <b>0.621**</b>                 | 30             |
| Firmicutes            | <b><i>Paenibacillus</i></b>    | <b>0.477**</b>                 | 30             |
|                       | <i>Bacillus</i>                | 0.035                          | 30             |
|                       | <i>Planomicrobium</i>          | 0.115                          | 30             |
|                       | <i>Enterococcus</i>            | 0.324                          | 30             |
|                       | <i>Brevibacillus</i>           | 0.042                          | 30             |
| Bacteroidetes         | <i>Flexibacter</i>             | 0.328                          | 30             |
|                       | <b><i>Sphingobacterium</i></b> | <b>0.502**</b>                 | 30             |
|                       | <i>Flavobacterium</i>          | 0.069                          | 30             |
|                       | <b><i>Chryseobacterium</i></b> | <b>0.492**</b>                 | 30             |
| Actinobacteria        | <b><i>Arthrobacter</i></b>     | <b>0.703**</b>                 | 30             |
|                       | <i>Streptomyces</i>            | 0.391*                         | 30             |
|                       | <i>Nocardia</i>                | -0.474**                       | 30             |
|                       | <i>Micromonospora</i>          | 0.110                          | 30             |

Note: Data in bold indicate strongly positive correlations between SPM and the abundance of denitrifying genera ( $P < 0.01$ ).

\*  $P < 0.05$ , \*\*  $P < 0.01$ .

**Supplementary Table S6** Primer sets used for qPCR

| Target gene     | Amplicon size (bp) | Primer       |                        | Annealing temp (°C) | Reference             |
|-----------------|--------------------|--------------|------------------------|---------------------|-----------------------|
|                 |                    | Name         | Sequence (5'-3')       |                     |                       |
| AOA <i>amoA</i> | ~635               | Arch amoA-1F | STAATGGTCTGGCTTAGACG   | 57                  | (Abell et al., 2010)  |
|                 |                    | Arch amoA-2R | GCGGCCATCCATCTGTATGT   |                     |                       |
| AOB <i>amoA</i> | ~490               | amoA-1F      | GGGGTTTCTACTGGTGGT     | 55                  | (Abell et al., 2010)  |
|                 |                    | amoA-2R      | CCCCTCKGSAAAGCCTTCTTC  |                     |                       |
| <i>nirS</i>     | 425                | Cd3aF        | GTSAACGTS AAGGARACSGG  | 57                  | (Abell et al., 2010)  |
|                 |                    | R3cd         | GASTTCGGRTGSGTCTTGA    |                     |                       |
| <i>nirK</i>     | 473                | F1aCu        | ATCATGGTSCTGCCGCG      | 58                  | (Zhang et al., 2014)  |
|                 |                    | R3Cu         | ATCATGGTSCTGCCGCG      |                     |                       |
| AMB 16S rRNA    | 280                | Brod541F     | GAGCACGTAGGTGGGTTTGT   | 59                  | (Penton et al., 2006) |
|                 |                    | Amx820R      | AAAACCCCTCTACTTAGTGCCC |                     |                       |



**Supplementary Table S7** 16S rRNA-targeted oligonucleotide probes used in this study

| Probe  | Specificity                                    | Sequence (5'-3')     | Target site <sup>a</sup> | FA <sup>b</sup> (%) | Reference              |
|--------|------------------------------------------------|----------------------|--------------------------|---------------------|------------------------|
| NSO190 | Ammonia-oxidizing<br>β-subclass Proteobacteria | CGATCCCCTGCTTTTCTCC  | 190–208                  | 45                  | (Mobarry et al., 1996) |
| DEN67  | Methanol-denitrifying cluster                  | CAAGCACCCGCGCTGCCG   | 67–86                    | 45                  | (Lu et al., 2014)      |
| DEN124 | Acetate-denitrifying cluster                   | CGACATGGGCGCGTTCCGAT | 124–143                  | 45                  | (Lu et al., 2014)      |

<sup>a</sup>16S rRNA position according to Escherichia coli numbering.

<sup>b</sup>FA, formamide concentration in the hybridization buffer.

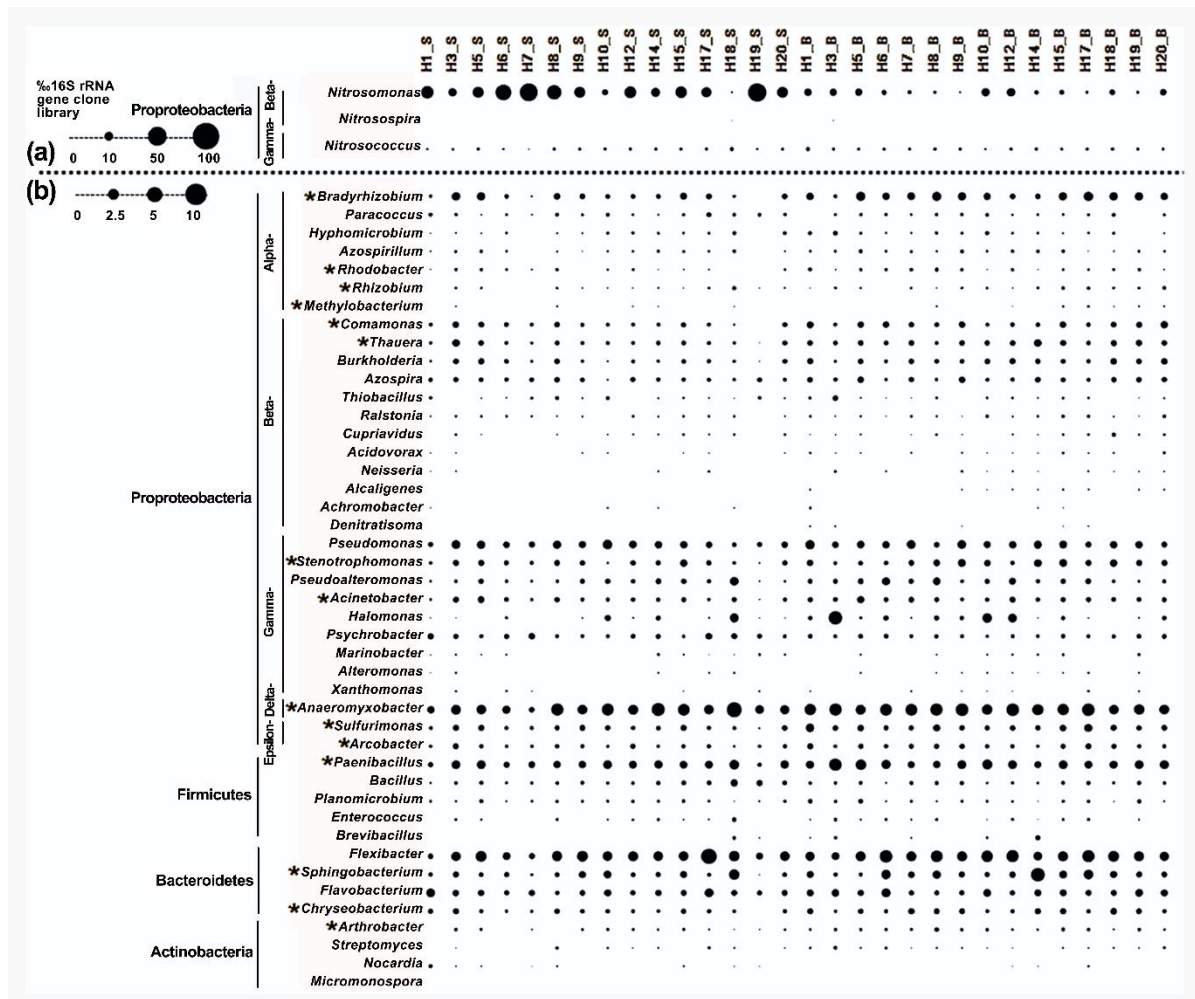

**Supplementary Figure S1** Dot plots of relative abundances of (a) nitrifying and (b) denitrifying genes at various sampling sites from the surface (\_S) and bottom (\_B) of the water column of Hangzhou Bay, revealed by 16S rRNA gene sequencing. Denitrifying genera significantly ( $P < 0.01$ ) correlated with SPM are indicated with asterisks, according to the results of Spearman's correlation analyses in Supplementary Table S5.

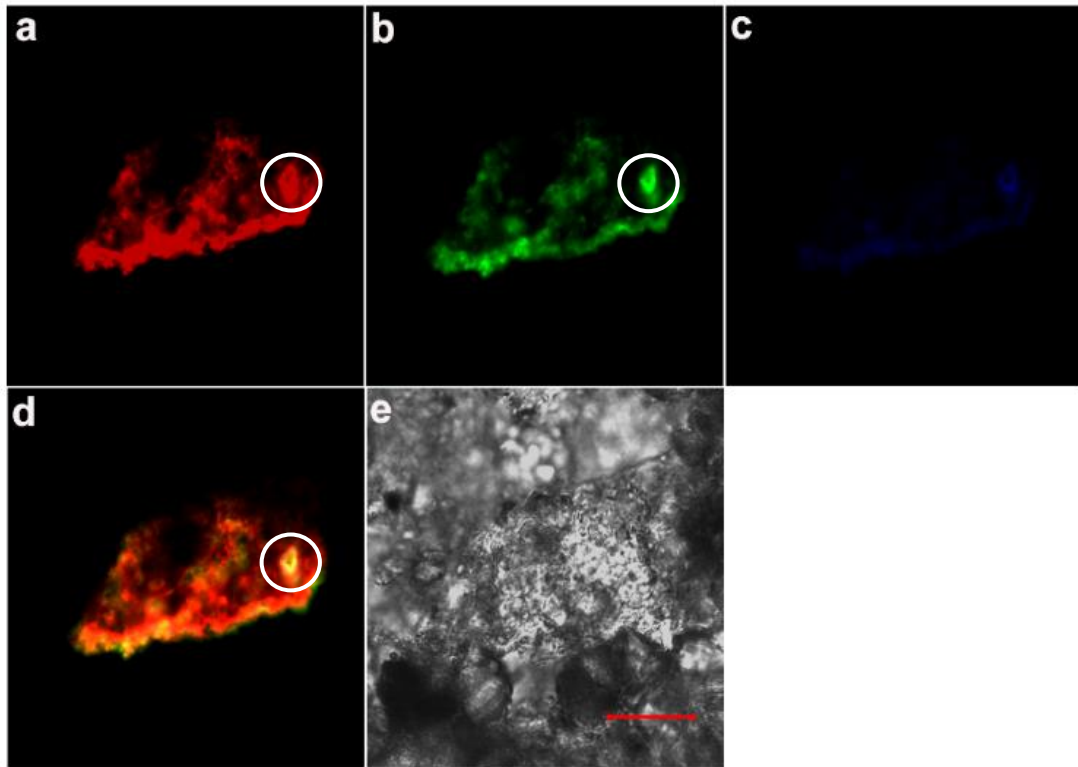

**Supplementary Figure S2** Simultaneous *in situ* hybridization of SPM samples in the water column of Hangzhou Bay. Fluorescence micrograph of (a) ammonia-oxidizing bacteria hybridization with Cy3-labeled probe NSO190 (red); (b) acetate-denitrifying cluster hybridization with FAM-labeled probe DEN124 (green); (c) methanol-denitrifying cluster hybridization with Cy5-labeled probe DEN67 (blue); (d) combined image of the three fluorescence micrographs, where the yellow cell aggregates are double labeled with NSO190 and DEN124, and the white cell aggregates are triple labeled with NSO190, DEN124 and DEN67. A phase contrast-micrograph of the floc section, where the red bar=20  $\mu\text{m}$ , is depicted in (e).

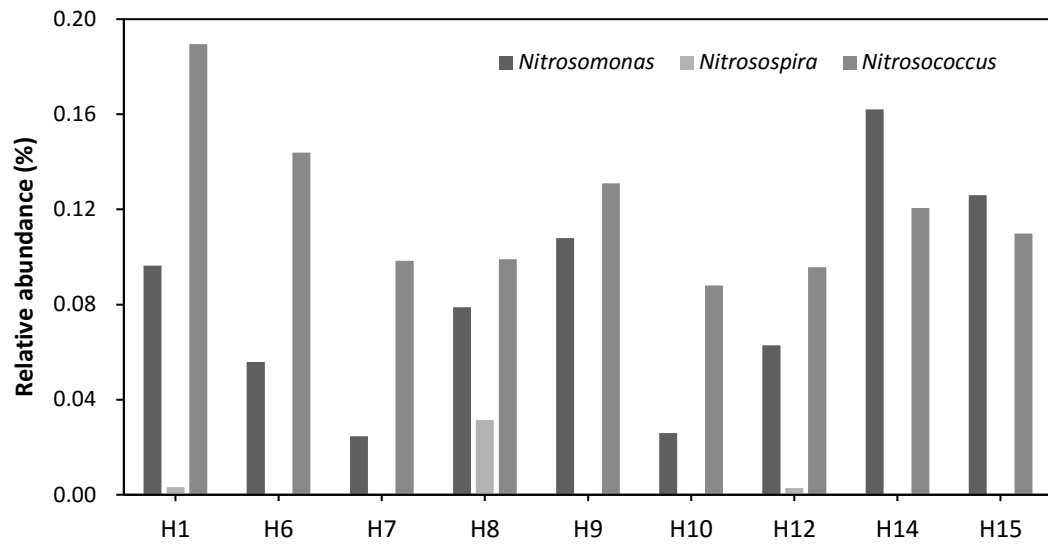

**Supplementary Figure S3** Relative abundances of nitrifying genera at sampling sites from Hangzhou Bay sediment, revealed by 16S rRNA gene sequencing.

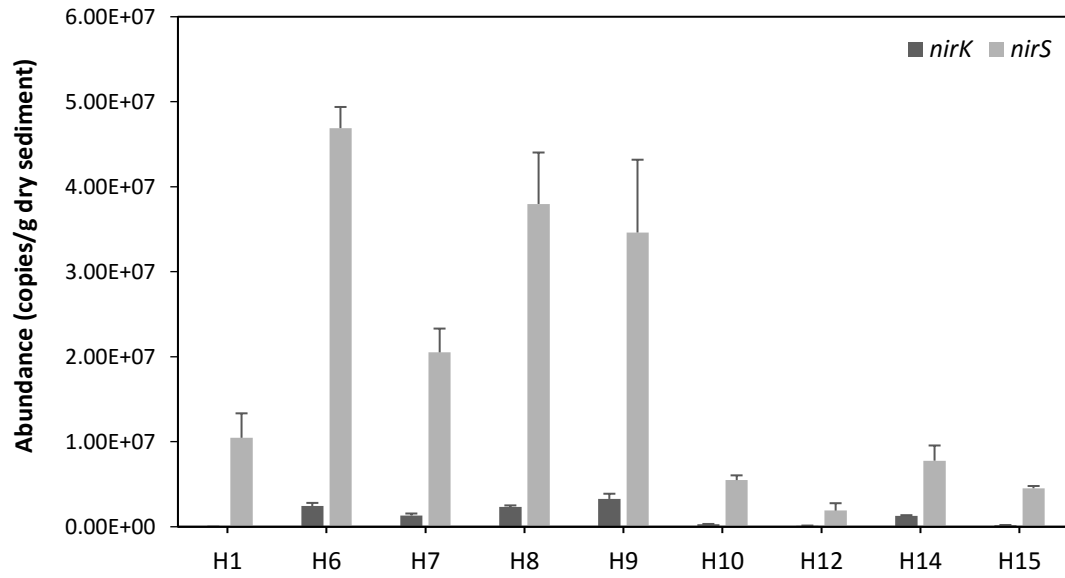

**Supplementary Figure S4** Copy numbers ( $\pm$ SD) of *nirK* and *nirS* genes determined for sediment samples (per g dry sediment) of Hangzhou Bay.

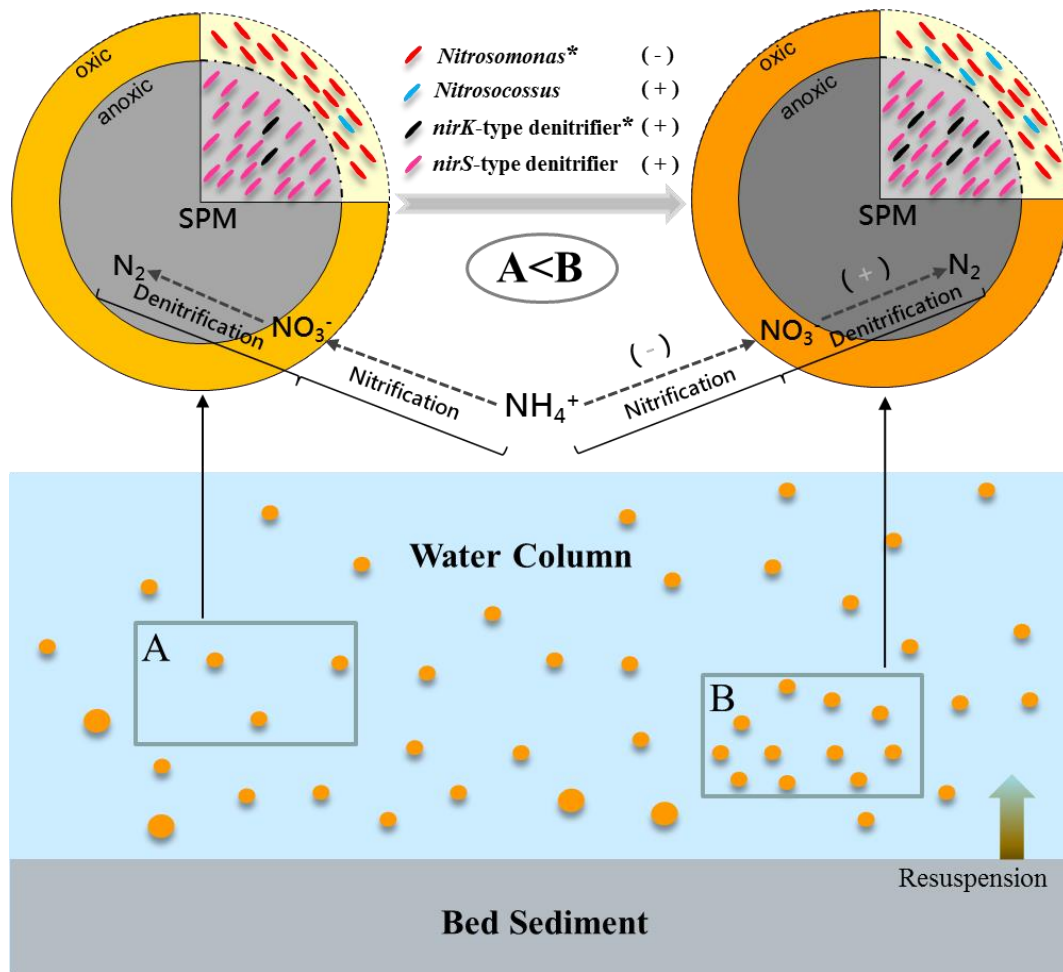

**Supplementary Figure S5** Schematic diagram of coupled nitrification-denitrification processes mediated by SPM in the water column of Hangzhou Bay. Asterisk ( \* ) indicates active phylotype in nitrification or denitrification process. The black plus ( + ) or minus ( - ) sign represents a significant increase or decrease when SPM concentration increases, while grey plus ( + ) or minus ( - ) sign does not indicate a significant relationship.

## References

- Abell, G.C., Revill, A.T., Smith, C., Bissett, A.P., Volkman, J.K., Robert, S.S., 2010. Archaeal ammonia oxidizers and *nirS*-type denitrifiers dominate sediment nitrifying and denitrifying populations in a subtropical macrotidal estuary. *ISME J.* 4 (2): 286-300.
- Lu, H., Chandran, K., Stensel, D. 2014. Microbial ecology of denitrification in biological wastewater treatment. *Water Res.* 64 (7): 237-254.
- Mobarry, B.K., Wagner, M., Urbain, V., Rittmann, B.E., Stahl, D.A., 1996. Phylogenetic probes for analyzing abundance and spatial organization of nitrifying bacteria. *Appl. Environ. Microbiol.* 63 (2): 2156-2162.
- Penton, C.R., Devol, A.H., Tiedje, J.M., 2006. Molecular evidence for the broad distribution of anaerobic ammonium-oxidizing bacteria in freshwater and marine sediments. *Appl. Environ. Microbiol.* 72 (10), 6829-6832.
- Zhang, X., Agogué, H., Dupuy, C., Gong, J., 2014. Relative abundance of ammonia oxidizers, denitrifiers, and anammox bacteria in sediments of hyper-nutriented estuarine tidal flats and in relation to environmental conditions. *CLEAN-Soil Air Water* 42 (6): 815-823.
- Zhi, E., Song, Y., Duan, L., Yu, H., Peng, J., 2015. Spatial distribution and diversity of microbial community in large-scale constructed wetland of the Liao River Conservation Area. *Environ. Earth. Sci.* 73 (9):5085-5094.
